# Supplementary material for: An In-Depth Analysis of Physical, Chemical, and Microplastic Parameters of Landfill Fine Fraction for Biocover Construction
Source: MDPI journal article supplement (doi:10.3390/su152416914), 2023-12-17
Supplement: s1 [file s1]

# An In-Depth Analysis of Physical, Chemical, and Microplastic Parameters of Landfill Fine Fraction for Biocover Construction

Anastasiia Sholokhova<sup>1,\*</sup>, Inna Pitak<sup>1</sup>, Gintaras Denafas<sup>1</sup>, Regina Kalpokaitė-Dičkuvienė<sup>1</sup>, Marius Praspaliauskas<sup>2</sup>, Juris Burlakovs<sup>3</sup>

<sup>1</sup> Laboratory of Materials Research and Testing, Lithuanian Energy Institute, Breslaujos st. 3, LT-44403, Kaunas, Lithuania

<sup>2</sup> Laboratory of Heat-Equipment Research and Testing, Lithuanian Energy Institute, Breslaujos st. 3, LT-44403, Kaunas, Lithuania

<sup>3</sup> Mineral and Energy Economy Research Institute of Polish Academy of Sciences, Józefa Wybickiego 7 A, Kraków, 31-261, Poland

\* Correspondence: anastasiia.sholokhova@lei.lt

## Supplementary materials

**Table S1.** Particle size distribution

| <b>Depth</b> | <b>Fraction size</b> |                 |                  |                     |
|--------------|----------------------|-----------------|------------------|---------------------|
|              | <b>6.3–20 mm</b>     | <b>2–6.3 mm</b> | <b>0.63–2 mm</b> | <b>&lt; 0.63 mm</b> |
| 0–1.5 m      | 28.94%               | 32.67%          | 20.05%           | 18.34%              |
| 1.5–3m       | 43.03%               | 36.93%          | 11.06%           | 8.98%               |
| 3–4.5 m      | 30.29%               | 45.36%          | 13.75%           | 10.60%              |
| 4.5–6 m      | 45.64%               | 33.56%          | 9.59%            | 11.22%              |
| 6–7.5 m      | 44.10%               | 39.71%          | 9.92%            | 6.26%               |
| 7.5–9 m      | 43.95%               | 35.76%          | 12.59%           | 7.70%               |
| 9–10.5 m     | 43.46%               | 34.57%          | 12.78%           | 9.19%               |

**Table S2.** Plastic content in different depths according to morphological analysis

| <b>Depth</b> | <b>Plastic content</b> |
|--------------|------------------------|
| 0–1.5 m      | 4%                     |
| 1.5–3m       | 7.05%                  |
| 3–4.5 m      | 18.46%                 |
| 4.5–6 m      | 6.21%                  |
| 6–7.5 m      | 8.69%                  |
| 7.5–9 m      | 7.94%                  |
| 9–10.5 m     | 2.46%                  |
